# Supplementary material
Source: HighWire-hosted journal article supplement (https://jnm.snmjournals.org/highwire/filestream/95415/field_highwire_adjunct_files/0/222547_Supplemental_Data.pdf)
Supplement: 222547_Supplemental_Data.pdf [file 222547_Supplemental_Data.pdf]

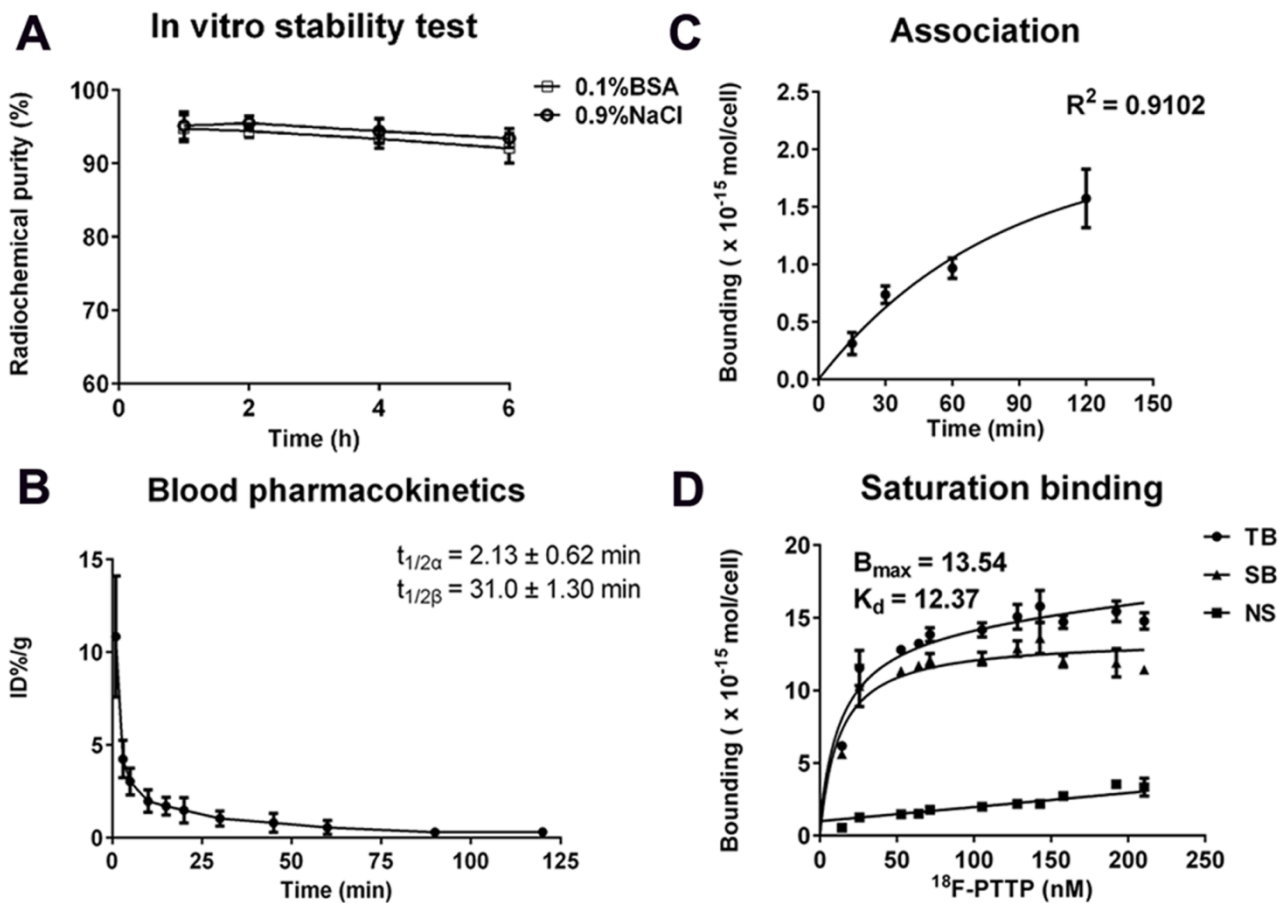

**Supplemental Figure 1. Characteristics of  $^{18}\text{F}$ -PTTP:** A. Solution stability of  $^{18}\text{F}$ -PTTP stabilities in 0.9% NaCl and 0.1% BSA at room temperature. B. Blood pharmacokinetics of  $^{18}\text{F}$ -PTTP in healthy mice ( $t_{1/2\alpha} = 2.13 \pm 0.62$  min,  $t_{1/2\beta} = 31 \pm 1.3$  min). C. Binding of  $^{18}\text{F}$ -PTTP to RAW264.7 cells expressing the P2X7 receptor as a function of incubation time. D. Saturation binding curve of  $^{18}\text{F}$ -PTTP. The SB curve was fitted with  $K_d$  is  $12.37 \pm 2.204$  nM ( $n = 3$ ) and  $B_{\max}$  is  $13.54 \times 10^{-15}$  mol/cell ( $n = 3$ ). NS: non-specific binding; TB: total binding; SB: specific binding.
